# Supplementary material for: TBMap: a taxonomic perspective on the phylogenetic database TreeBASE
Source: Springer Nature journal article supplement (doi:10.1186/1471-2105-8-158), 2007-05-18

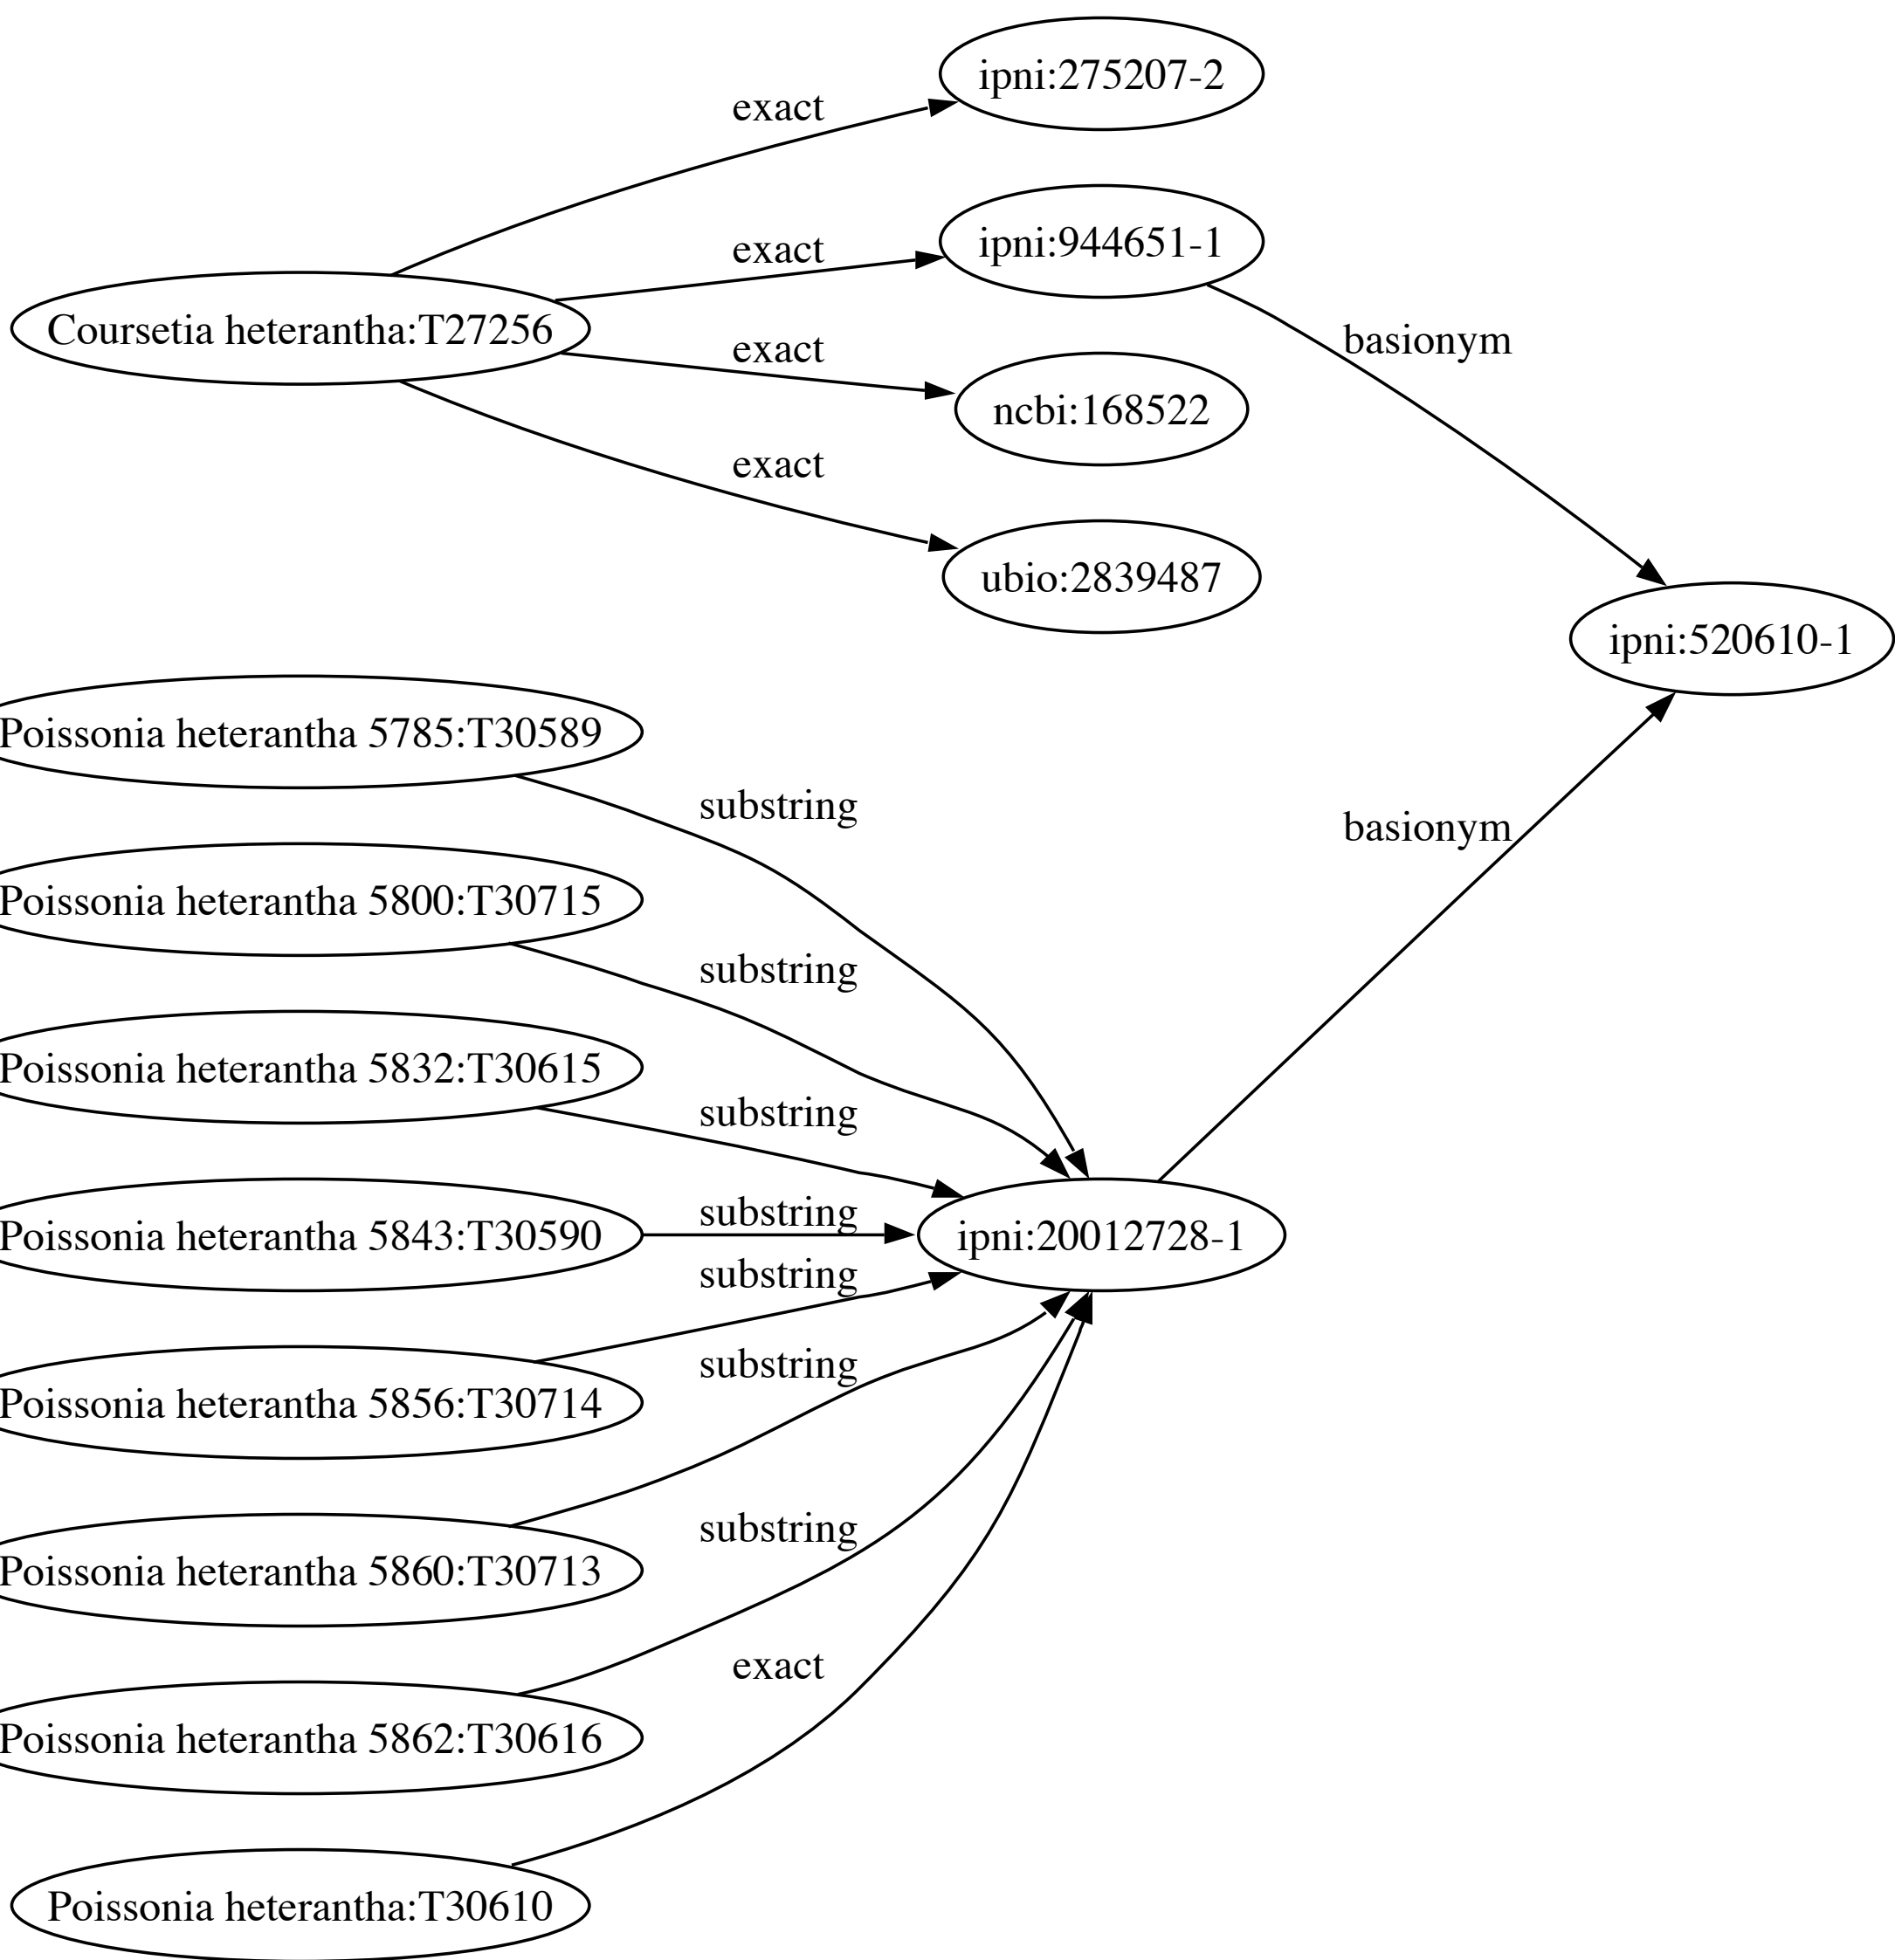

Supplement: 12859_2007_1530_MOESM2_ESM.pdf [file 12859_2007_1530_MOESM2_ESM.pdf]
